# Supplementary material
Source: PubMed Central journal article supplement (PMC1599981)

**Immunocytochemical TCR $\alpha$ /TCR $\beta$  double-staining of human (A-E) and mouse neutrophils (F-H): Controls**

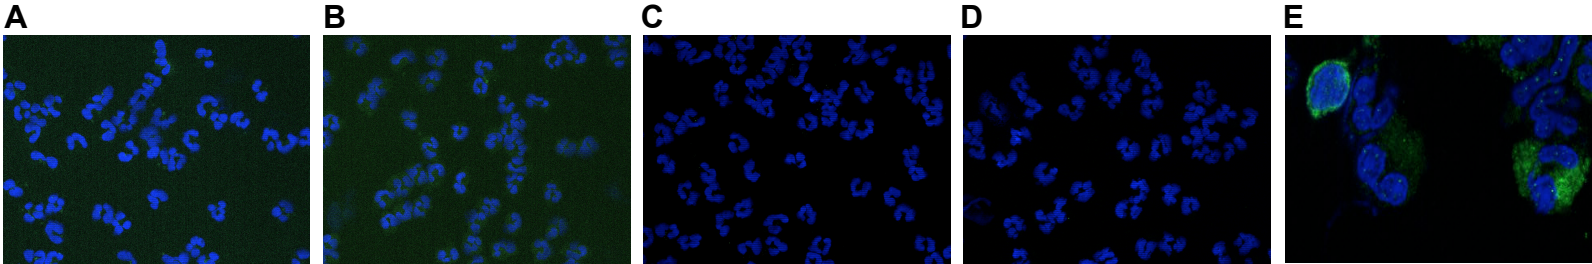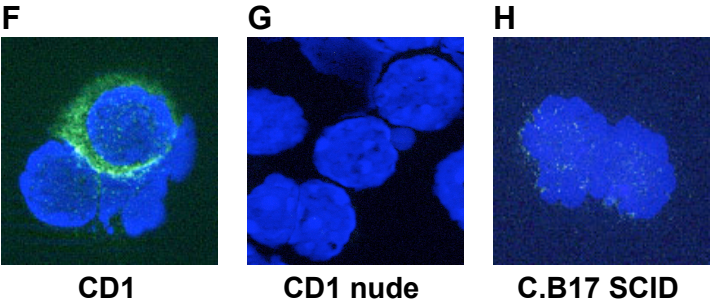

Supplement: pnas_0603406103_1.pdf [file pnas_0603406103_1.pdf]
