# Supplementary material
Source: PubMed Central journal article supplement (PMC1599981)

# TCR $\alpha\beta$ expression in neutrophils from individuals with primary (X-SCID) and secondary severe T cell deficiency (acute graft rejection)

**A**

**X-SCID**

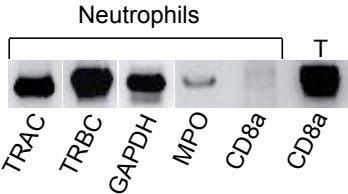

**B**

**Acute graft rejection**

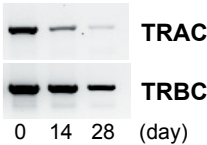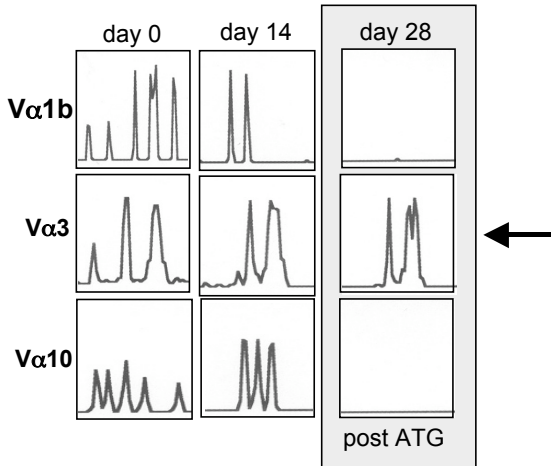

Supplement: pnas_0603406103_6.pdf [file pnas_0603406103_6.pdf]
