# Supplementary material
Source: PubMed Central journal article supplement (PMC1599981)
Supplement: pnas_0603406103_8.pdf [file pnas_0603406103_8.pdf]

# TCRV $\alpha$ 3

## CDR3 region

## TRAC (Exon 1)

..ASYFCA

TRLTIIPNIQ NPDPVAVYQLRDSK..

| Time point           | CDR3 region sequence      | Percentage (%) | Notes        |
|----------------------|---------------------------|----------------|--------------|
| <b>-6mo</b>          | ..TDYARLMFGDG..           | 34             | } post G-CSF |
|                      | ..AITSYDKVIFGPG..         |                |              |
|                      | ..TMNTGFQKLVFGTG..        | 18             |              |
|                      | ..TEGNFGNEKLTFTGTG..      | 32             |              |
|                      | ..TDGFSYNTDKLIFGTG..      |                |              |
|                      | ..TDAFITNAGGTSYGKLTFGQG.. |                |              |
| <b>0h</b>            | ..TDYARLMFGDG..           | 26             |              |
|                      | ..KEYGNKLVFGAG..          |                |              |
|                      | ..TITSYDKVIFGPG..         |                |              |
|                      | ..TEGSQGNLIFGKG..         |                |              |
|                      | ..TGSSNTGKLI FGQG..       |                |              |
|                      | ..TMNTGFQKLVFGTG..        | 16             |              |
| ..TEGNFGNEKLTFTGTG.. | 38                        |                |              |
| <b>48h</b>           | ..TDYARLMFGDG..           | 31             |              |
|                      | ..TGSSNTGKLI FGQG..       |                |              |
|                      | ..TMNTGFQKLVFGTG..        | 8              |              |
|                      | ..TEGNFGNEKLTFTGTG..      | 54             |              |
| <b>28d</b>           | ..TDYARLMFGDG..           | 23             |              |
|                      | ..TITSYDKVIFGPG..         |                |              |
|                      | ..TGSSNTGKLI FGQG..       |                |              |
|                      | ..TMNTGFQKLVFGTG..        | 25             |              |
|                      | ..TGGGQGAQKLVFGQG..       |                |              |
|                      | ..TEGNFGNEKLTFTGTG..      | 38             |              |
