# Supplementary material
Source: PubMed Central journal article supplement (PMC1599981)

**A**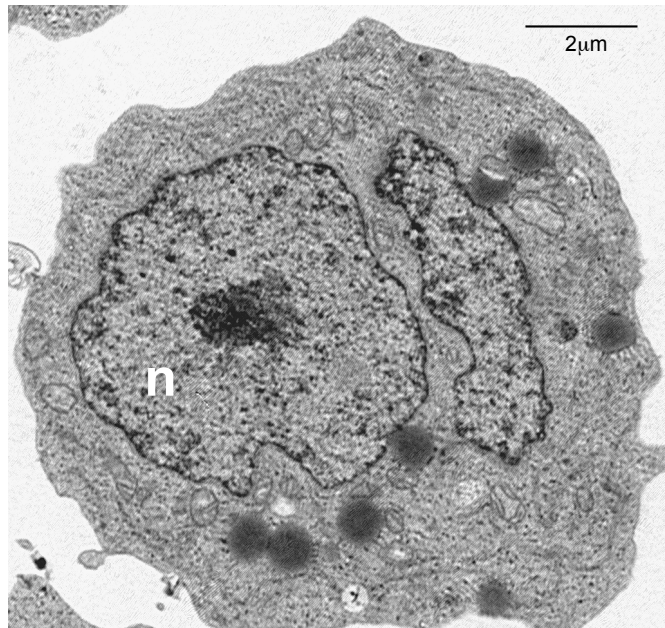**B**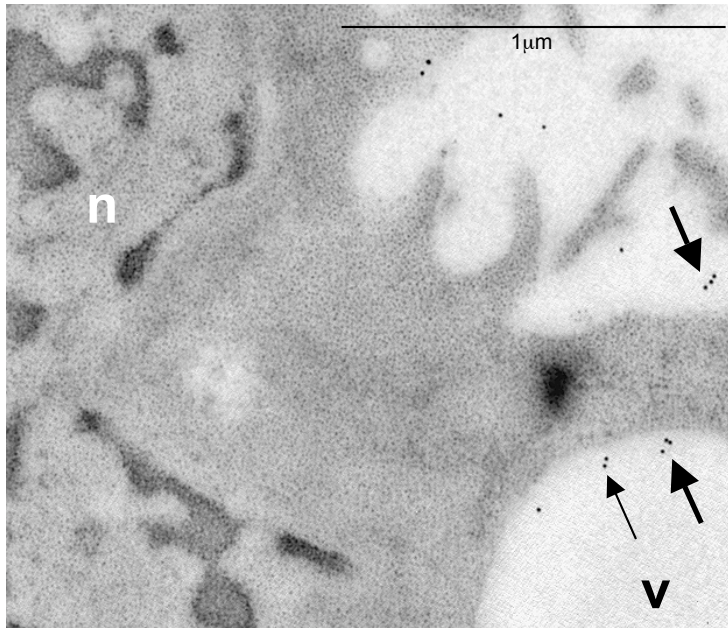

Supplement: pnas_0603406103_2.pdf [file pnas_0603406103_2.pdf]

**A****T cell cDNA**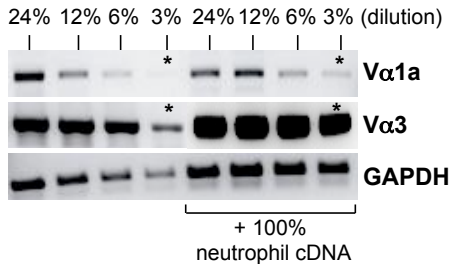**B****cDNA**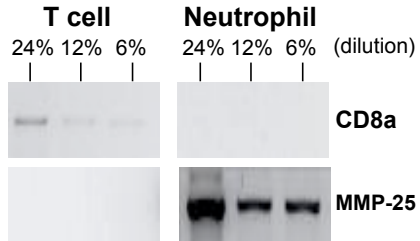

Supplement: pnas_0603406103_3.pdf [file pnas_0603406103_3.pdf]

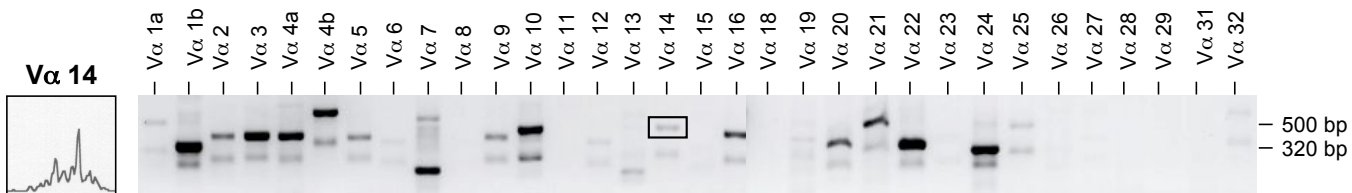

**Neutrophils 1**

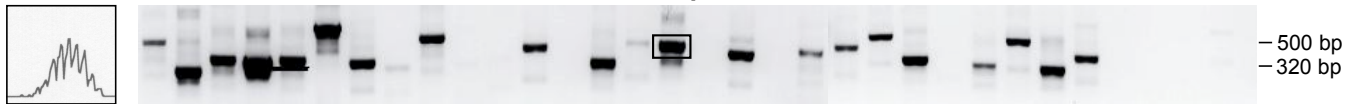

**T cells 2**

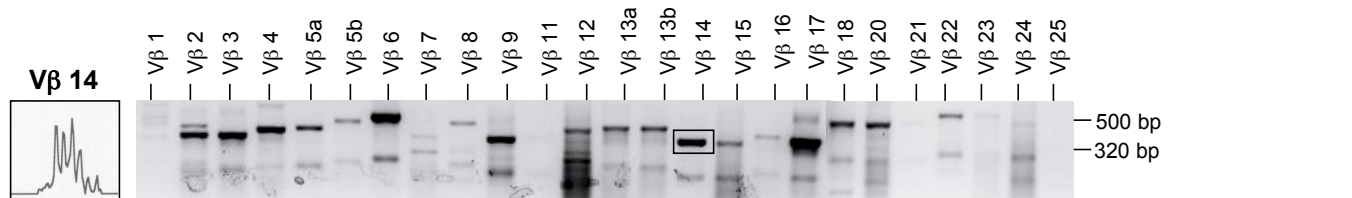

**Neutrophils 2**

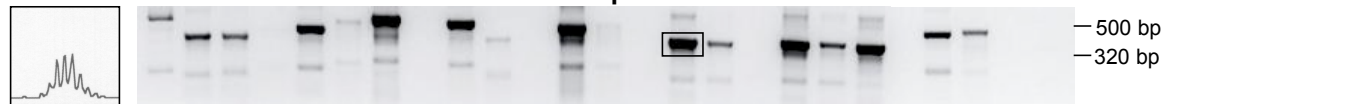

**T cells 2**

Supplement: pnas_0603406103_4.pdf [file pnas_0603406103_4.pdf]

# Neutrophils

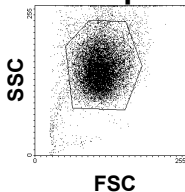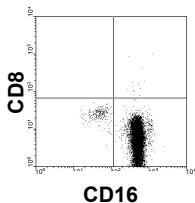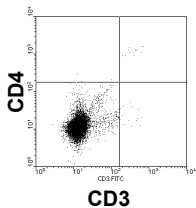

# HL-60

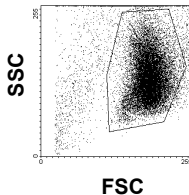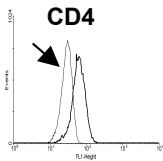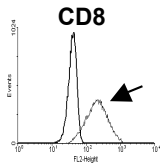

Supplement: pnas_0603406103_5.pdf [file pnas_0603406103_5.pdf]

# G-CSF mediated induction of granulopoiesis *in vivo*

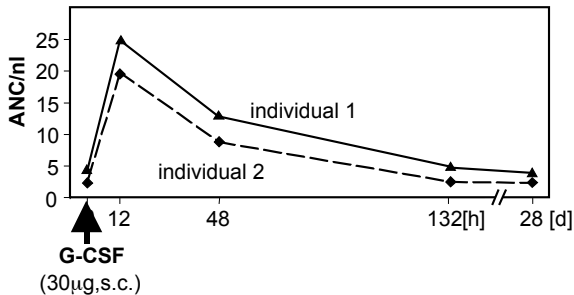

## Granulocytes

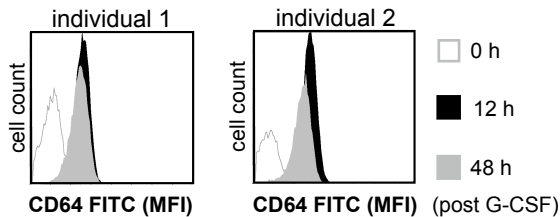

Supplement: pnas_0603406103_7.pdf [file pnas_0603406103_7.pdf]

## IL-8 secretion

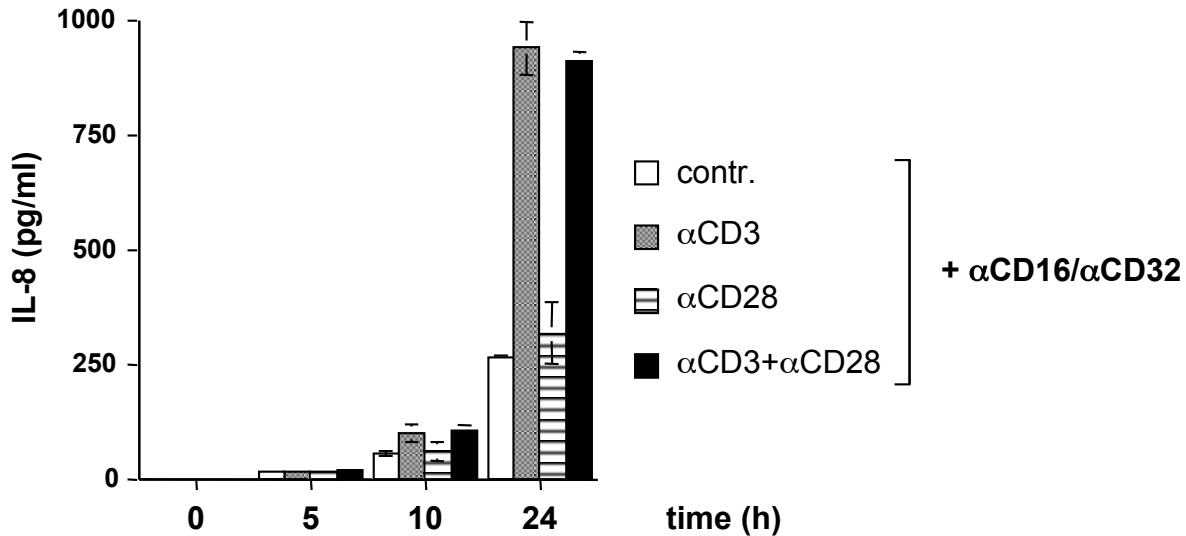

Supplement: pnas_0603406103_9.pdf [file pnas_0603406103_9.pdf]
